# Supplementary material for: Coexisting ovarian and tubal pregnancies on opposite sides after intrauterine insemination: a case report
Source: Springer Nature journal article supplement (doi:10.1186/s12884-018-1801-6), 2018-06-25
Supplement: MOESM1 [file 15878328]

**No Relevant Past Medical History**

**Current Illness**

- Lower abdominal pain
- Amenorrhea for 5 weeks and 4 days
- Post COH IUI state

**Physical Examination**

- Normal vital signs
- Diffuse lower abdominal tenderness

**Diagnostic Evaluations**

- Serum beta-chorionic gonadotropin level
- Transvaginal ultrasound

**Diagnoses**

- Hemoperitoneum
- R/O Ruptured ectopic pregnancy

Oct 13, 2015

Oct 13, 2015

**Emergency diagnostic laparoscopy**

Oct 23, 2015

**Check final histopathology**

**Final outcome: Good recovery**
